# Supplementary material
Source: PubMed Central journal article supplement (PMC1914187)
Supplement: plntphys_pp.107.095992_2.pdf [file plntphys_pp.107.095992_2.pdf]

**Supplemental Figure S1.** A possible process to generate a truncated *Ubiquitin* promoter fused with a truncated 35S promoter found in a surviving callus with positive-negative selection.

**A**, Generation of truncated and fused promoters from at least two T-DNA molecules. A deletion indicated by the bracket under the two double-stranded T-DNA molecules resulted in the fusion of two promoter sequences. **B**, The junction sequences generated by fusion of the *Ubiquitin* and 35S promoter sequences. The sequences found in the recombinants are indicated by uppercase characters, and the numerals with L and R above and below the sequences indicate the positions from the left and right border sequences, respectively. Three and two common nucleotides enclosed were found at the junctions of Hb-1 and Hb-3, respectively, whereas a filler sequence of a five A stretch in bold was detected at the Hb-2 junction. Interestingly, we also noted the occurrence of two single-base alterations near the Hb-2 junction, as indicated by the underlined bold font.
